# Supplementary material
Source: PubMed Central journal article supplement (PMC5330931)
Supplement: NIHMS811390-supplement-01.pdf [file NIHMS811390-supplement-01.pdf]

**Supplemental Table 1.** Mean, SD and %CV of serum NT-proANP analysis (n=5)

| Lab           | Group           | Male (Prestudy)   |      |       | Male (Day 2)   |       |       | Male (Day 8)   |       |       |
|---------------|-----------------|-------------------|------|-------|----------------|-------|-------|----------------|-------|-------|
|               |                 | Mean (ng/ml)      | SD   | %CV   | Mean (ng/ml)   | SD    | %CV   | Mean (ng/ml)   | SD    | %CV   |
| SRI           | Vehicle Control | 19.59             | 5.86 | 29.91 | 20.32          | 5.36  | 26.38 | 18.94          | 2.44  | 12.89 |
|               | Minoxidil       | 19.53             | 4.36 | 22.33 | 44.30          | 10.45 | 23.58 | 40.88          | 10.63 | 26.01 |
|               | Isoproterenol   | 20.50             | 4.48 | 21.83 | 62.14          | 12.77 | 20.55 | 25.80          | 1.94  | 7.54  |
| Lilly (MSD)   | Vehicle Control | 17.04             | 8.65 | 50.77 | 25.12          | 6.53  | 25.98 | 23.78          | 4.10  | 17.25 |
|               | Minoxidil       | 18.71             | 5.58 | 29.85 | 49.48          | 5.43  | 10.98 | 46.20          | 14.50 | 31.39 |
|               | Isoproterenol   | 20.20             | 6.71 | 33.23 | 65.94          | 10.93 | 16.58 | 29.84          | 1.83  | 6.12  |
| Lilly (Alpco) | Vehicle Control | 14.71             | 4.74 | 32.27 | 13.59          | 5.00  | 36.81 | 14.73          | 2.30  | 15.65 |
|               | Minoxidil       | 12.68             | 2.70 | 21.30 | 32.17          | 6.42  | 19.97 | 28.39          | 8.78  | 30.94 |
|               | Isoproterenol   | 14.07             | 4.52 | 32.12 | 58.47          | 17.57 | 30.05 | 20.99          | 3.24  | 15.44 |
| Lab           | Group           | Female (Prestudy) |      |       | Female (Day 2) |       |       | Female (Day 8) |       |       |
|               |                 | Mean (ng/ml)      | SD   | %CV   | Mean (ng/ml)   | SD    | %CV   | Mean (ng/ml)   | SD    | %CV   |
| SRI           | Vehicle Control | 14.85             | 3.78 | 25.47 | 14.02          | 3.42  | 24.42 | 15.86          | 4.08  | 25.75 |
|               | Minoxidil       | 12.21             | 2.98 | 24.41 | 41.70          | 10.46 | 25.08 | 40.58          | 5.33  | 13.13 |
|               | Isoproterenol   | 13.21             | 1.62 | 12.24 | 41.72          | 7.64  | 18.30 | 21.68          | 4.10  | 18.90 |
| Lilly (MSD)   | Vehicle Control | 10.11             | 5.88 | 58.17 | 18.24          | 4.83  | 26.48 | 18.10          | 3.70  | 20.47 |
|               | Minoxidil       | 13.39             | 5.83 | 43.55 | 48.18          | 10.81 | 22.43 | 50.86          | 6.89  | 13.54 |
|               | Isoproterenol   | 14.08             | 5.39 | 38.28 | 46.66          | 17.76 | 38.06 | 25.98          | 5.05  | 19.43 |
| Lilly (Alpco) | Vehicle Control | 12.10             | 3.76 | 31.07 | 10.65          | 2.23  | 20.94 | 13.17          | 4.64  | 35.21 |
|               | Minoxidil       | 10.85             | 4.11 | 37.90 | 30.97          | 11.22 | 36.23 | 32.39          | 5.01  | 15.48 |
|               | Isoproterenol   | 11.80             | 5.15 | 43.68 | 45.17          | 13.62 | 30.16 | 12.56          | 3.40  | 27.07 |

**Supplemental Table 2.** Mean, SD and %CV of serum NT-proBNP analysis (n=5)

| Lab   | Group           | Male<br>(Day 2)   |        |        | Male<br>(Day 8)   |        |       |
|-------|-----------------|-------------------|--------|--------|-------------------|--------|-------|
|       |                 | Mean<br>(pg/ml)   | SD     | %CV    | Mean<br>(pg/ml)   | SD     | %CV   |
| SRI   | Vehicle Control | 169.74            | 82.59  | 48.66  | 153.64            | 52.27  | 34.02 |
|       | Minoxidil       | 406.60            | 47.04  | 11.57  | 413.80            | 118.84 | 28.72 |
|       | Isoproterenol   | 403.00            | 219.38 | 54.44  | 368.80            | 178.45 | 48.39 |
| Lilly | Vehicle Control | 178.48            | 99.42  | 55.71  | 155.55            | 75.91  | 48.80 |
|       | Minoxidil       | 400.04            | 59.99  | 15.00  | 441.68            | 142.88 | 32.35 |
|       | Isoproterenol   | 433.84            | 237.11 | 54.65  | 243.92            | 75.64  | 31.01 |
| Lab   | Group           | Female<br>(Day 2) |        |        | Female<br>(Day 8) |        |       |
|       |                 | Mean<br>(pg/ml)   | SD     | %CV    | Mean<br>(pg/ml)   | SD     | %CV   |
| SRI   | Vehicle Control | 62.44             | 31.30  | 50.13  | 53.18             | 23.65  | 44.47 |
|       | Minoxidil       | 144.78            | 47.68  | 32.94  | 236.40            | 155.79 | 65.90 |
|       | Isoproterenol   | 308.48            | 314.86 | 102.07 | 121.28            | 32.46  | 26.77 |
| Lilly | Vehicle Control | 58.76             | 31.44  | 53.50  | 53.16             | 16.79  | 31.58 |
|       | Minoxidil       | 165.10            | 50.29  | 30.46  | 254.42            | 130.05 | 51.12 |
|       | Isoproterenol   | 323.40            | 302.28 | 93.47  | 130.30            | 34.84  | 26.74 |

**Supplemental Table 3.** Mean, SD and %CV of serum Myl3 analysis (n=5)

| Lab   | Group           | Male<br>(Day 2)   |       |       | Male<br>(Day 8)   |       |       |
|-------|-----------------|-------------------|-------|-------|-------------------|-------|-------|
|       |                 | Mean<br>(ng/ml)   | SD    | %CV   | Mean<br>(ng/ml)   | SD    | %CV   |
| SRI   | Vehicle Control | 0.140             | 0.063 | 44.89 | 0.158             | 0.053 | 33.31 |
|       | Minoxidil       | 0.114             | 0.029 | 25.27 | 0.072             | 0.029 | 39.77 |
|       | Isoproterenol   | 15.104            | 8.521 | 56.41 | 0.114             | 0.046 | 40.48 |
| Lilly | Vehicle Control | 0.211             | 0.063 | 29.99 | 0.331             | 0.130 | 39.12 |
|       | Minoxidil       | 0.177             | 0.040 | 22.32 | 0.136             | 0.040 | 29.13 |
|       | Isoproterenol   | 15.500            | 8.719 | 56.25 | 0.187             | 0.066 | 35.16 |
| Lab   | Group           | Female<br>(Day 2) |       |       | Female<br>(Day 8) |       |       |
|       |                 | Mean<br>(ng/ml)   | SD    | %CV   | Mean<br>(ng/ml)   | SD    | %CV   |
| SRI   | Vehicle Control | 0.256             | 0.089 | 34.79 | 0.142             | 0.049 | 34.28 |
|       | Minoxidil       | 0.088             | 0.040 | 45.03 | 0.130             | 0.034 | 26.09 |
|       | Isoproterenol   | 7.646             | 4.175 | 54.60 | 0.212             | 0.090 | 42.51 |
| Lilly | Vehicle Control | 0.277             | 0.077 | 27.90 | 0.188             | 0.045 | 24.06 |
|       | Minoxidil       | 0.184             | 0.062 | 33.86 | 0.199             | 0.094 | 47.12 |
|       | Isoproterenol   | 8.202             | 4.391 | 53.53 | 0.330             | 0.098 | 29.69 |

**Supplemental Table 4.** Mean, SD and %CV of serum FABP3 analysis (n=5)

| Lab | Group           | Male (Day 2)   |       |        | Male (Day 8)   |       |        |
|-----|-----------------|----------------|-------|--------|----------------|-------|--------|
|     |                 | Mean (ng/ml)   | SD    | %CV    | Mean (ng/ml)   | SD    | %CV    |
| SRI | Vehicle Control | 6.146          | 2.687 | 43.72  | 4.878          | 2.418 | 49.56  |
|     | Minoxidil       | 4.480          | 2.819 | 117.05 | 6.066          | 6.557 | 108.09 |
|     | Isoproterenol   | 9.074          | 5.916 | 55.65  | 11.196         | 5.602 | 50.04  |
| Lab | Group           | Female (Day 2) |       |        | Female (Day 8) |       |        |
|     |                 | Mean (ng/ml)   | SD    | %CV    | Mean (ng/ml)   | SD    | %CV    |
| SRI | Vehicle Control | 3.974          | 2.924 | 73.58  | 9.254          | 6.735 | 72.78  |
|     | Minoxidil       | 3.016          | 4.059 | 134.58 | 4.268          | 1.678 | 39.31  |
|     | Isoproterenol   | 8.184          | 5.661 | 69.17  | 8.140          | 2.737 | 33.63  |

**Supplemental Table 5.** Mean, SD and %CV of serum cTnI analysis (n=5)

| Lab    | Group           | Male<br>(Day 2)   |        |        | Male<br>(Day 8)   |        |        |
|--------|-----------------|-------------------|--------|--------|-------------------|--------|--------|
|        |                 | Mean<br>(ng/ml)   | SD     | %CV    | Mean<br>(ng/ml)   | SD     | %CV    |
| SRI    | Vehicle Control | 0.008             | 0.0084 | 104.58 | 0.000             | 0.000  | 0.000  |
|        | Minoxidil       | 0.002             | 0.0045 | 223.61 | 0.000             | 0.000  | 0.000  |
|        | Isoproterenol   | 3.588             | 4.3545 | 121.36 | 0.000             | 0.000  | 0.000  |
| Pfizer | Vehicle Control | 0.000             | 0.000  | 0.000  | 0.000             | 0.000  | 0.000  |
|        | Minoxidil       | 0.020             | 0.0308 | 154.11 | 0.000             | 0.000  | 0.000  |
|        | Isoproterenol   | 8.406             | 11.517 | 137.01 | 0.000             | 0.000  | 0.000  |
| Lab    | Group           | Female<br>(Day 2) |        |        | Female<br>(Day 8) |        |        |
|        |                 | Mean<br>(ng/ml)   | SD     | %CV    | Mean<br>(ng/ml)   | SD     | %CV    |
| SRI    | Vehicle Control | 0.004             | 0.0055 | 136.93 | 0.000             | 0.000  | 0.000  |
|        | Minoxidil       | 0.000             | 0.000  | 0.000  | 0.000             | 0.000  | 0.000  |
|        | Isoproterenol   | 0.222             | 0.1703 | 76.74  | 0.002             | 0.0045 | 223.61 |
| Pfizer | Vehicle Control | 0.000             | 0.000  | 0.000  | 0.000             | 0.000  | 0.000  |
|        | Minoxidil       | 0.000             | 0.000  | 0.000  | 0.006             | 0.0134 | 223.61 |
|        | Isoproterenol   | 0.464             | 0.3794 | 81.76  | 0.012             | 0.0268 | 223.61 |

**Supplemental Table 6.** Mean, SD and %CV of serum cTnT analysis (n=5)

| Lab | Group           | Male<br>(Day 2)   |        |        | Male<br>(Day 8)   |        |        |
|-----|-----------------|-------------------|--------|--------|-------------------|--------|--------|
|     |                 | Mean<br>(ng/ml)   | SD     | %CV    | Mean<br>(ng/ml)   | SD     | %CV    |
| SRI | Vehicle Control | 0.008             | 0.0179 | 223.61 | 0.020             | 0.0447 | 223.61 |
|     | Minoxidil       | 0.040             | 0.0552 | 138.07 | 0.000             | 0.000  | 0.000  |
|     | Isoproterenol   | 1.274             | 0.8355 | 65.58  | 0.046             | 0.0445 | 96.73  |
| Lab | Group           | Female<br>(Day 2) |        |        | Female<br>(Day 8) |        |        |
|     |                 | Mean<br>(ng/ml)   | SD     | %CV    | Mean<br>(ng/ml)   | SD     | %CV    |
| SRI | Vehicle Control | 0.344             | 0.1686 | 49.02  | 0.152             | 0.1775 | 116.80 |
|     | Minoxidil       | 0.000             | 0.000  | 0.000  | 0.020             | 0.0447 | 223.61 |
|     | Isoproterenol   | 0.124             | 0.1226 | 98.87  | 0.028             | 0.0390 | 139.24 |

**Supplemental Table 7.** Mean, SD and %CV of serum sTnI analysis (n=5)

| Lab | Group           | Male<br>(Day 2)   |        |        | Male<br>(Day 8)   |        |        |
|-----|-----------------|-------------------|--------|--------|-------------------|--------|--------|
|     |                 | Mean<br>(ng/ml)   | SD     | %CV    | Mean<br>(ng/ml)   | SD     | %CV    |
| SRI | Vehicle Control | 1.980             | 0.9483 | 47.90  | 0.368             | 0.4262 | 115.82 |
|     | Minoxidil       | 2.334             | 2.0442 | 87.58  | 1.398             | 2.0997 | 150.19 |
|     | Isoproterenol   | 2.474             | 0.8499 | 34.35  | 3.106             | 2.1607 | 69.56  |
| Lab | Group           | Female<br>(Day 2) |        |        | Female<br>(Day 8) |        |        |
|     |                 | Mean<br>(ng/ml)   | SD     | %CV    | Mean<br>(ng/ml)   | SD     | %CV    |
| SRI | Vehicle Control | 2.258             | 1.4026 | 62.12  | 3.512             | 2.3356 | 66.50  |
|     | Minoxidil       | 0.126             | 0.2817 | 223.61 | 1.492             | 0.7660 | 51.34  |
|     | Isoproterenol   | 0.762             | 0.7989 | 104.84 | 1.002             | 0.4677 | 46.68  |

**Supplemental Table 8.** Correlation analysis of NT-proANP, NT-proBNP, Myl3 and cTnI

| <b>Biomarker</b> | <b>Laboratory (Platform)</b>  | <b>Correlation Coefficient (r)</b> | <b>95% Confidence Interval</b> | <b>R<sup>2</sup></b> |
|------------------|-------------------------------|------------------------------------|--------------------------------|----------------------|
| NT-proANP        | SRI (MSD)<br>Lilly (MSD)      | 0.9460                             | 0.9224-<br>0.9626              | 0.8950               |
| NT-proANP        | Lilly (MSD)<br>Lilly (Alpco)  | 0.8777                             | 0.8283-<br>0.9135              | 0.7703               |
| NT-proBNP        | SRI (MSD)<br>Lilly (MSD)      | 0.9125                             | 0.8566-<br>0.9472              | 0.8327               |
| Myl3             | SRI (MSD)<br>Lilly (MPI)      | 0.9982                             | 0.9969-<br>0.9989              | 0.9963               |
| cTnI             | SRI (MSD)<br>Pfizer (Siemens) | 0.9970                             | 0.9919-<br>0.9989              | 0.9939               |



**Supplemental Table 9.** Inter-laboratory or inter-platform Mean and %CV of NT-proANP, NT-proBNP, Myl3 and cTnI (n=2)

| Biomarker | Lab (Platform)               | Group           | Male (Prestudy) |       | Male (Day 2) |       | Male (Day 8) |       | Female (Prestudy) |       | Female (Day 2) |       | Female (Day 8) |       |
|-----------|------------------------------|-----------------|-----------------|-------|--------------|-------|--------------|-------|-------------------|-------|----------------|-------|----------------|-------|
|           |                              |                 | Mean            | %CV   | Mean         | %CV   | Mean         | %CV   | Mean              | %CV   | Mean           | %CV   | Mean           | %CV   |
| NT-proANP | SRI (MSD) & Lilly (MSD)      | Vehicle Control | 18.31           | 9.85  | 22.72        | 14.94 | 21.36        | 16.01 | 12.48             | 26.87 | 16.13          | 18.50 | 16.98          | 9.33  |
|           |                              | Minoxidil       | 19.12           | 3.03  | 46.89        | 7.81  | 43.54        | 8.64  | 12.80             | 6.51  | 44.94          | 10.20 | 45.72          | 15.90 |
|           |                              | Isoproterenol   | 20.35           | 1.04  | 64.04        | 4.20  | 27.82        | 10.27 | 13.65             | 4.51  | 44.19          | 7.90  | 23.83          | 12.76 |
| NT-proANP | Lilly (MSD) & Lilly (Alpco)  | Vehicle Control | 15.87           | 10.39 | 19.36        | 42.11 | 19.25        | 33.23 | 11.10             | 12.68 | 14.45          | 37.15 | 15.64          | 22.29 |
|           |                              | Minoxidil       | 15.69           | 27.18 | 40.83        | 29.97 | 37.29        | 33.77 | 12.12             | 14.84 | 39.58          | 30.75 | 41.62          | 31.38 |
|           |                              | Isoproterenol   | 17.14           | 25.29 | 62.20        | 8.49  | 25.42        | 24.61 | 12.94             | 12.48 | 45.91          | 2.30  | 19.27          | 49.23 |
| NT-proBNP | SRI (MSD) & Lilly (MSD)      | Vehicle Control | NA              | NA    | 174.11       | 3.55  | 154.60       | 0.87  | NA                | NA    | 60.60          | 4.29  | 53.17          | 0.03  |
|           |                              | Minoxidil       | NA              | NA    | 403.32       | 1.15  | 427.74       | 4.61  | NA                | NA    | 154.94         | 9.27  | 245.41         | 5.19  |
|           |                              | Isoproterenol   | NA              | NA    | 418.42       | 5.21  | 306.36       | 28.82 | NA                | NA    | 315.94         | 3.34  | 125.79         | 5.07  |
| Myl3      | SRI (MSD) & Lilly (MPI)      | Vehicle Control | NA              | NA    | 0.175        | 28.48 | 0.245        | 50.11 | NA                | NA    | 0.266          | 5.52  | 0.165          | 19.79 |
|           |                              | Minoxidil       | NA              | NA    | 0.146        | 30.77 | 0.104        | 43.51 | NA                | NA    | 0.136          | 50.05 | 0.165          | 29.73 |
|           |                              | Isoproterenol   | NA              | NA    | 15.302       | 1.83  | 0.151        | 34.46 | NA                | NA    | 7.924          | 4.96  | 0.271          | 30.87 |
| cTnI      | SRI (MSD) & Pfizer (Siemens) | Vehicle Control | NA              | NA    | 0.004        | 141.4 | 0.000        | 0.000 | NA                | NA    | 0.002          | 141.4 | 0.000          | 0.000 |
|           |                              | Minoxidil       | NA              | NA    | 0.011        | 115.7 | 0.000        | 0.000 | NA                | NA    | 0.000          | 0.000 | 0.003          | 141.4 |
|           |                              | Isoproterenol   | NA              | NA    | 5.997        | 56.81 | 0.000        | 0.000 | NA                | NA    | 0.343          | 49.89 | 0.007          | 101.0 |

NA; data not available
